# Supplementary material
Source: Springer Nature journal article supplement (https://www.springermedizin.de/resource/supplementary/13049_2008_37_MOESM2_ESM.pdf/9665744)

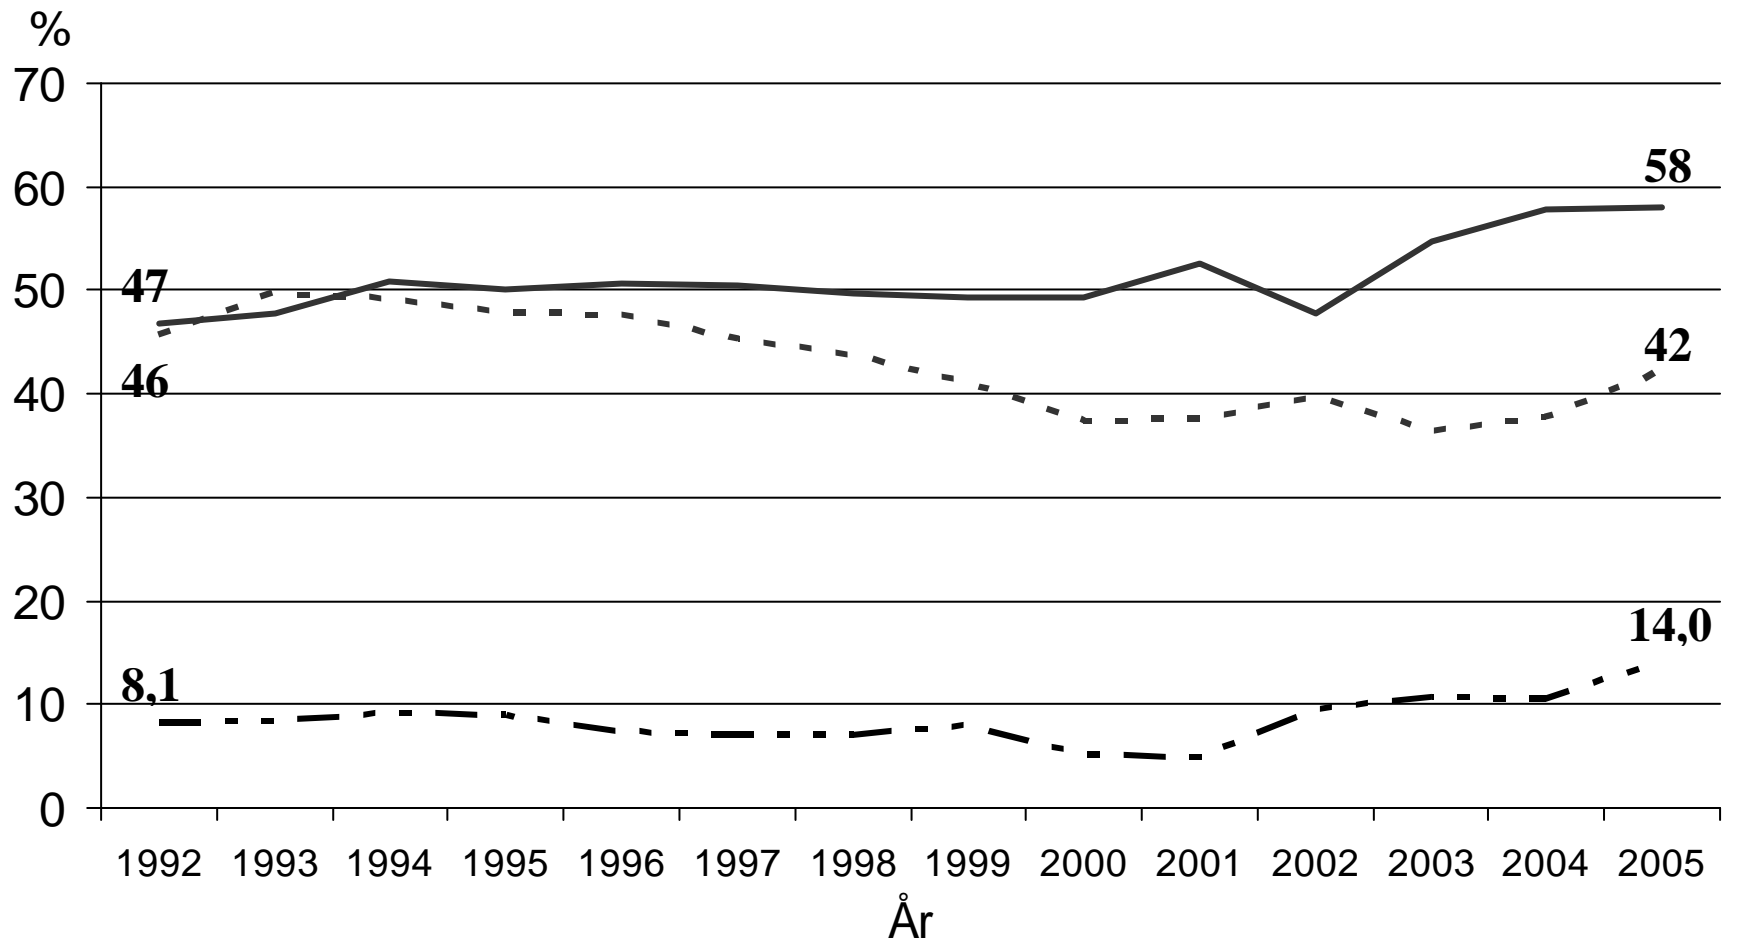

— Bystander CPR    - - - VF/VT    - . - Alive after 1 month

Supplement: MOESM2 [file 9665744]
